# Supplementary material for: Modulation of hyperthermic and relaxometric responses of magnetic iron oxide nanoparticles through ligand exchange provides design criteria for dual-functionality
Source: Royal Society of Chemistry journal article supplement (doi:10.1039/d3tc00489a), 2023-01-01
Supplement: d3tc00489a1.pdf [file d3tc00489a1.pdf]

Modulation of hyperthermic and relaxometric responses of magnetic iron oxide nanoparticles through ligand exchange provides design criteria for dual-functionality

Esther Rani Aluri,<sup>†</sup> Sameer D. Shingte,<sup>1†</sup> Eoin P. McKiernan,<sup>1</sup> Steven Ferguson,<sup>2</sup> Dermot F. Brougham<sup>1\*</sup>

1. School of Chemistry, University College Dublin, Belfield, Dublin 4, Ireland.

2. School of Chemical and Bioprocess Engineering, University College Dublin, Belfield, Dublin 4, Ireland.

*Supplementary information*

**Table S1:** SAR, hydrodynamic size, and particle sizes of OA/OAm-MNP suspensions (toluene) synthesised by modifying in the reaction steps, precursor to surfactant ratio, and varying the passage of gas. For the above reaction procedures, precursor and solvent were used from the same source.

| A. Modifications in reagents/gas                                         | SAR (W g <sup>-1</sup> ) | DLS                         |            | TEM                          |            |
|--------------------------------------------------------------------------|--------------------------|-----------------------------|------------|------------------------------|------------|
|                                                                          |                          | <i>d<sub>hyd</sub></i> (nm) | <i>PDI</i> | <i>d<sub>core</sub></i> (nm) | St Dev (%) |
| Reaction in Ar gas                                                       | 76                       | 20                          | 0.11       | -                            | -          |
| Dry octyl ether (Dried on 3 Å molecular sieves)                          | 731                      | 26                          | 0.13       | -                            | -          |
| Octyl ether added from glove box                                         | 398                      | 21                          | 0.09       | -                            | -          |
| <b>B. Modifications in reaction steps</b>                                |                          |                             |            |                              |            |
| Direct reflux 1h-N <sub>2</sub> atm (No hold at 200 °C) Same as Cheon    | 318                      | 23                          | 0.29       | 16.3                         | 4.8        |
| Direct reflux 1h- atm (No hold at 200 °C)                                | 201                      | 20                          | 0.19       | 17.3                         | 3.1        |
| Reflux 2h- N <sub>2</sub> atm (Hold at 200 °C; 1 h)                      | 175                      | 18                          | 0.14       | 15.9                         | 2.9        |
| Reflux 1h- N <sub>2</sub> atm (Degas 110 °C- 30 min Hold at 200 °C- 1 h) | 60                       | 21                          | 0.13       | -                            | -          |
| <b>C. Modifications in precursor to surfactant ratio</b>                 |                          |                             |            |                              |            |
| Fe(acac) <sub>3</sub> : Surfactants 1:4                                  | 43                       | 28                          | 0.13       | -                            | -          |
| Fe(acac) <sub>3</sub> : Surfactants 1:5                                  | 63                       | 21                          | 0.08       | -                            | -          |

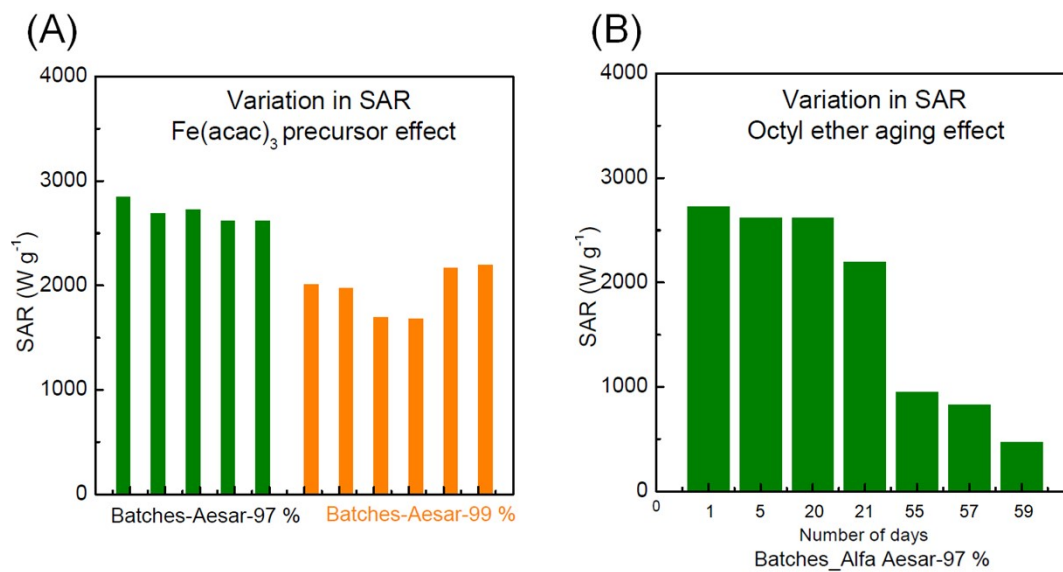

**Figure S1:** Reproducibility of the optimised OA/OAm-MNP synthesis protocol. (A) Variation in SAR values obtained for OA/OAm-MNP suspensions prepared using iron (III) precursors from different sources. (B) SAR variation with ageing (time after opening the bottle) of the octyl ether reaction solvent.

**Table S2:** SAR values (at 535 kHz, 16 kA m<sup>-1</sup>) of OA/OAm-MNP toluene suspensions, colloidal characterisation in toluene, and TEM characterisation of multiple batches prepared using different precursor sources.

| Precursor source                             | SAR<br>(W g <sup>-1</sup> ) | DLS                          |            | TEM                          |              |
|----------------------------------------------|-----------------------------|------------------------------|------------|------------------------------|--------------|
|                                              |                             | <i>d</i> <sub>hyd</sub> (nm) | <i>PDI</i> | <i>d</i> <sub>TEM</sub> (nm) | Std.dev. (%) |
| <b>Fe(acac)<sub>3</sub>, Alfa Aesar, 97%</b> | 2844                        | 28                           | 0.15       | 16.1±0.6                     | 3.7          |
|                                              | 2692                        | 24                           | 0.19       | -                            | -            |
|                                              | 2726                        | 25                           | 0.18       | 15.2±0.7                     | 4.7          |
|                                              | 2620                        | 28                           | 0.28       | -                            | -            |
|                                              | 2620                        | 23                           | 0.18       | 16.2±1.0                     | 5.9          |
| <b>Fe(acac)<sub>3</sub>, Alfa Aesar, 99%</b> | 2013                        | 19                           | 0.09       | -                            | -            |
|                                              | 1977                        | 21                           | 0.14       | -                            | -            |
|                                              | 1698                        | 26                           | 0.09       | 15.5±2.0                     | 12.9         |
|                                              | 1681                        | 22                           | 0.07       | -                            | -            |
|                                              | 2164                        | 23                           | 0.13       | 16.0±0.6                     | 3.7          |
|                                              | 2195                        | 24                           | 0.11       | -                            | -            |

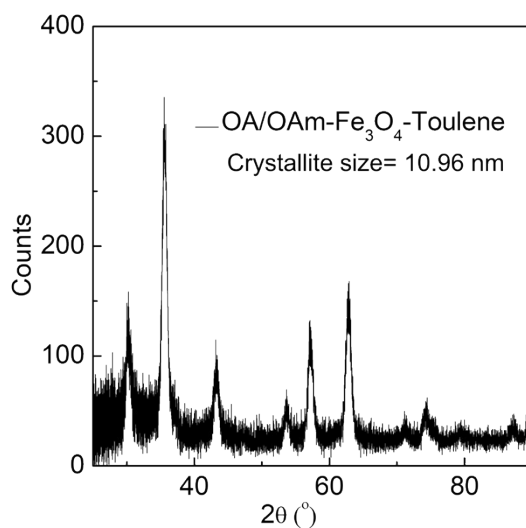

**Figure S2:** XRD patterns of OA/OAm-MNPs with a crystallite size of 11.0 nm

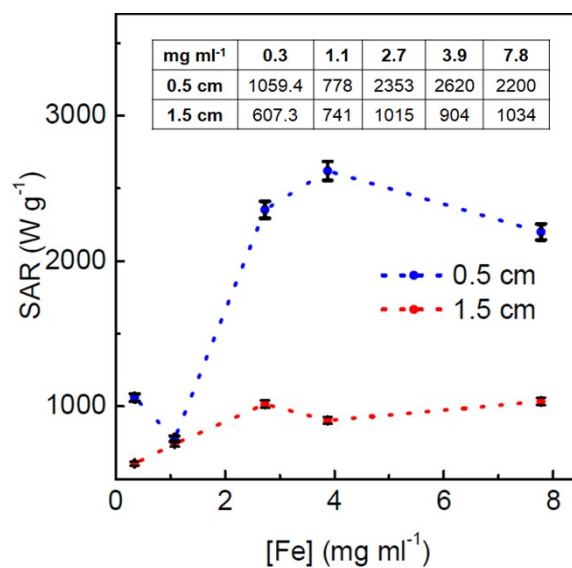

**Figure S3:** SAR as a function of Fe concentration, measured with the thermal probe placed at 0.5 and 1.5 cm from the bottom for the same OA/OAm-MNP suspension.
